# Supplementary material
Source: PubMed Central journal article supplement (PMC6137542)
Supplement: fj.15-275834.sd1.pdf [file fj.15-275834.sd1.pdf]

## **Supplementary Figure Legends.**

### **Supplementary Figure 1. rAAV2/1-IFN- $\gamma$ expression does not alter ubiquitin immunoreactivity in the brain.**

Representative images of ubiquitin immunoreactivity in cortex and hippocampus of 3 month old rTg4510 mice (top panels, A) or pons and hippocampus of 12 month old JNPL3 (top panel, B) are shown. Higher magnification of selected area of interest from the top panels is depicted as numbered panels on the bottom of corresponding original intact brain area. Scale Bar, 100 $\mu$ m (top), 15  $\mu$ m (insets, bottom). n=4mice/group.

### **Supplementary Figure 2. rAAV2/1-IFN- $\gamma$ expression does not alter argyrophillic inclusions in the brain.**

Representative images of silver stained deposits in intact cortex, hippocampus and thalamus of 3 month old rTg4510 mice (A) or cortex, hippocampus and pons of 12 month old JNPL3 (B) are shown. Scale Bar, 15  $\mu$ m. n=4mice/group.

### **Supplementary Figure 3. Phosphorylated tau levels or astrocytosis is not affected by IFN- $\gamma$ expression in the spinal cords of 12 month old JNPL3 mice.**

Representative images of phosphorylated tau (CP13) and astrocytes (GFAP) in the white matter and grey matter of cervical spinal cords of rAAV2/1-IFN- $\gamma$  expressing or control JNPL3 mice is depicted. Scale Bar, 300  $\mu$ m (left intact spinal cord panels); 30  $\mu$ m (higher magnification of areas of interest, right panels). n=3 female mice/group
