# Supplementary material
Source: PubMed Central journal article supplement (PMC6137542)

A

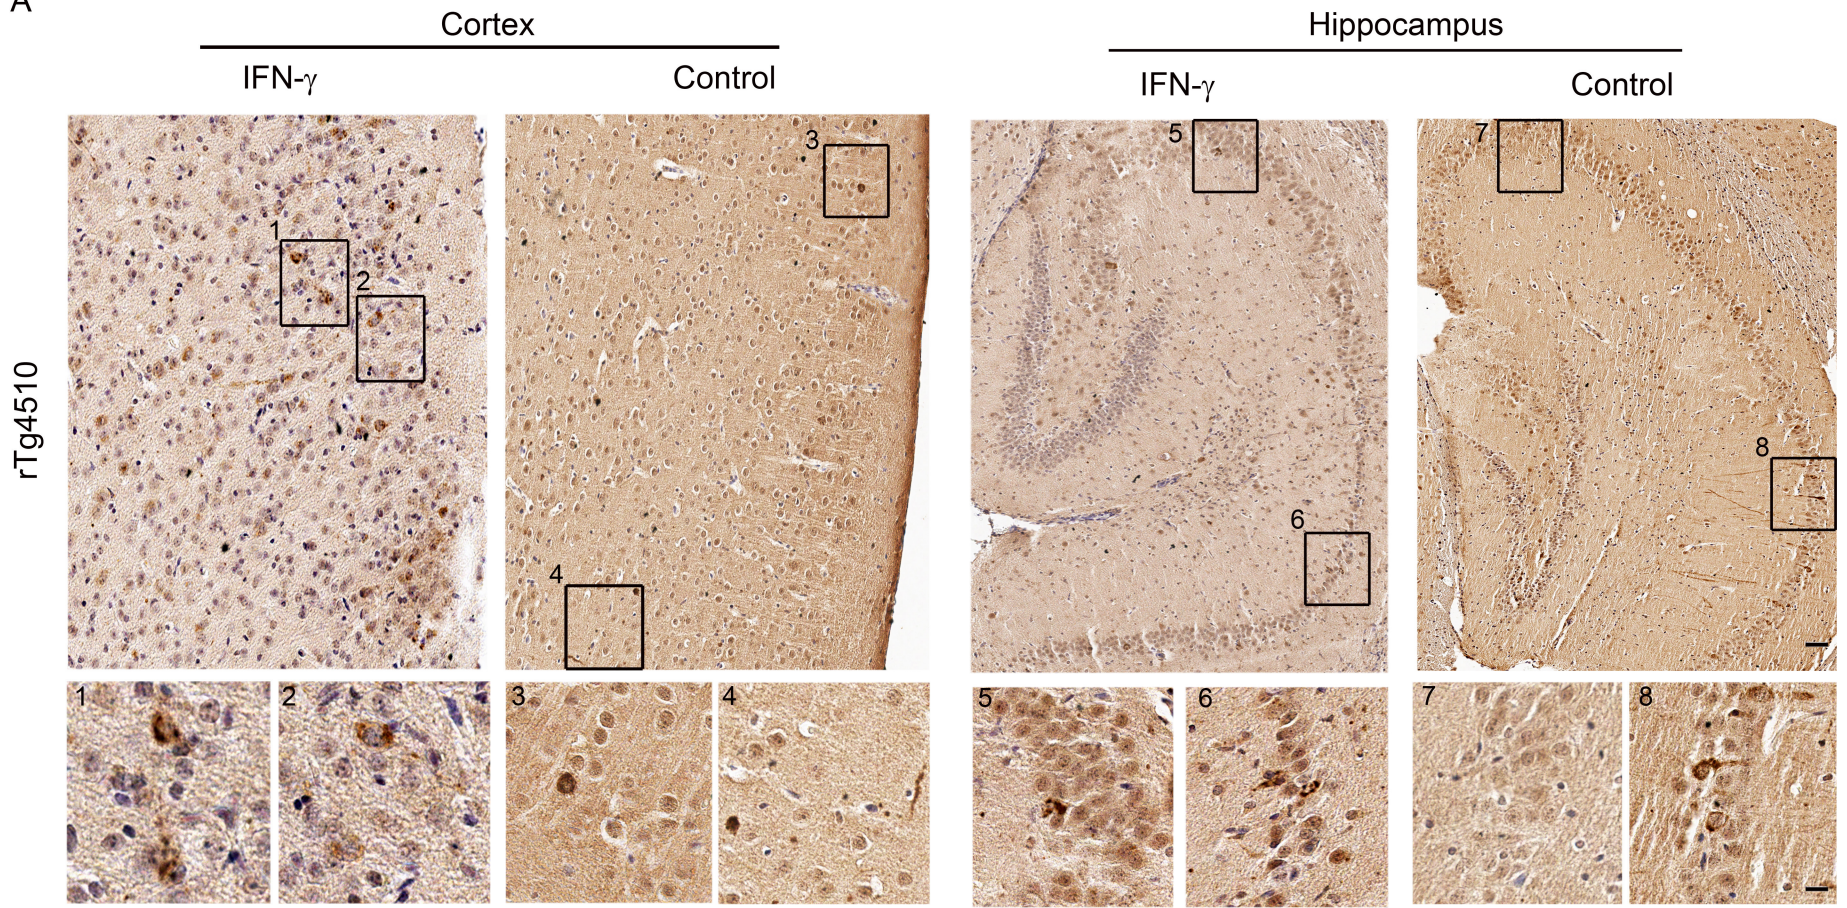

B

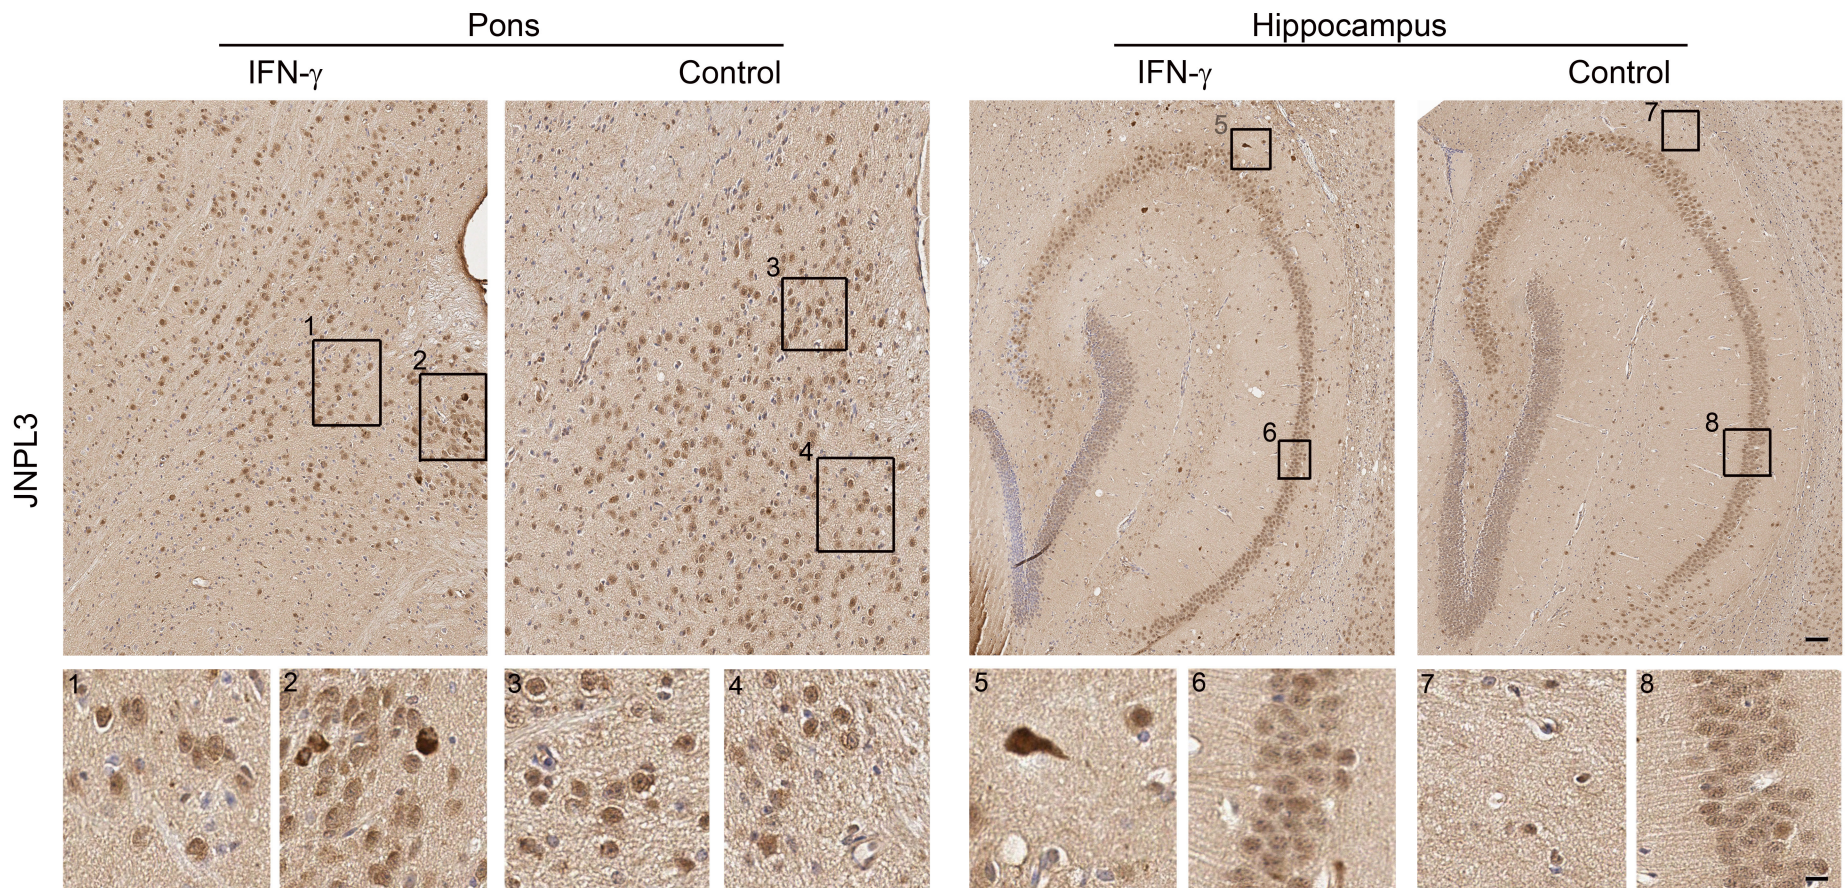

Supplement: fj.15-275834.sf1.pdf [file fj.15-275834.sf1.pdf]

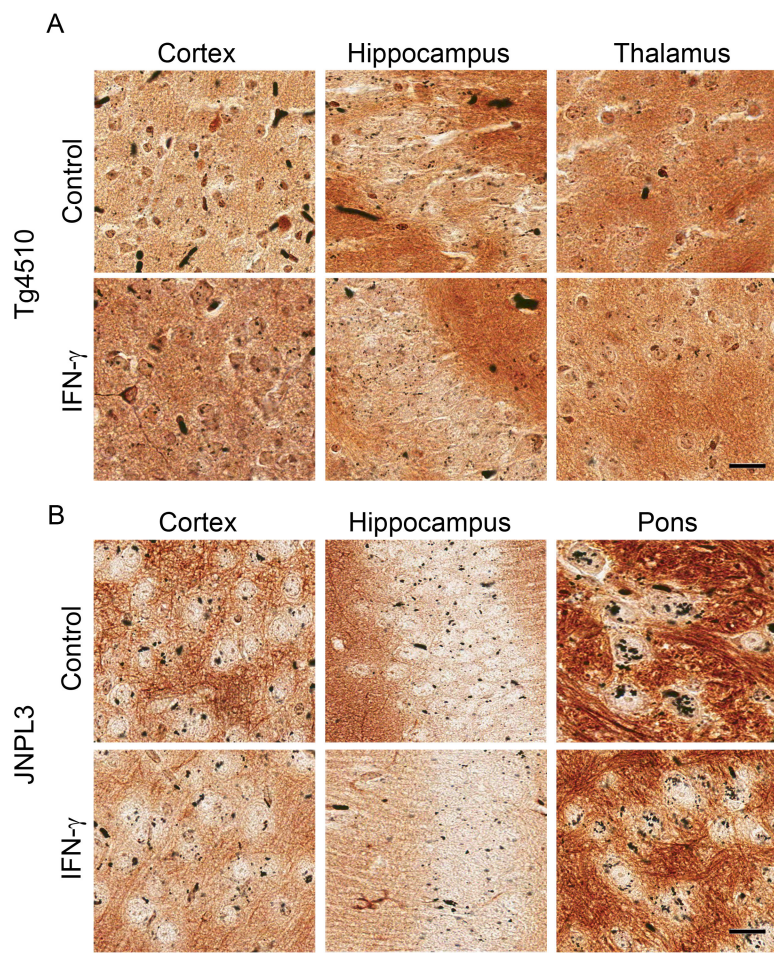

Supplementary Figure 2

Supplement: fj.15-275834.sf2.pdf [file fj.15-275834.sf2.pdf]

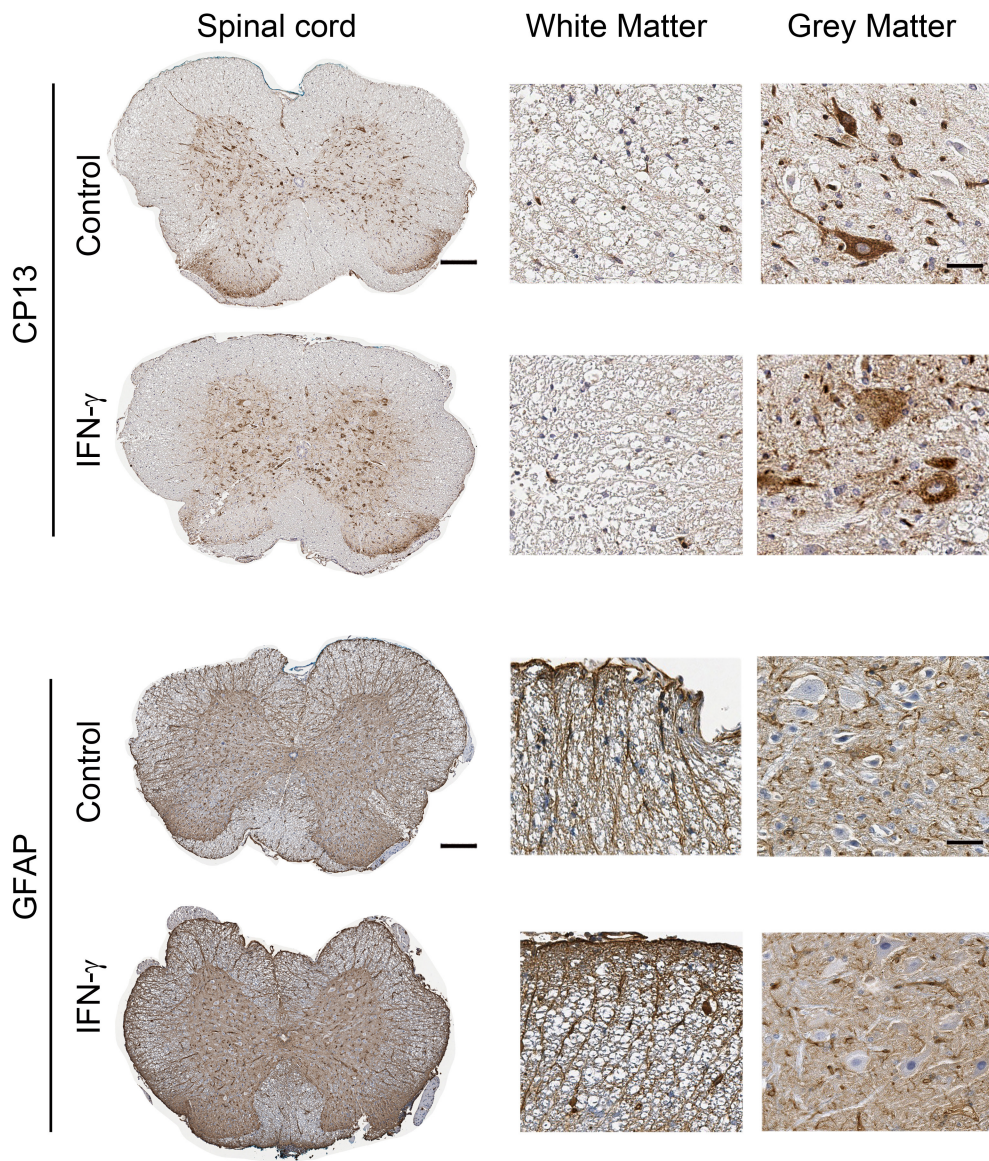

Supplementary Figure 3

Supplement: fj.15-275834.sf3.pdf [file fj.15-275834.sf3.pdf]
